1 **Full title:**

2 Patient self-reported pain and nausea via smartphone following daycare surgery, first year results: An  
3 observational cohort study

4 **Short title:** Patient self-reported pain and nausea via smartphone following daycare surgery

5

6 **Authors:**

7 Bram Thiel<sup>1\*</sup>, Jamey Blaauboer<sup>2</sup>, Chiem Seesing<sup>2</sup>, Jamshid Radmanesh<sup>3</sup>, Seppe Koopman<sup>4</sup>, Cor  
8 Kalkman<sup>5</sup>, Marc Godfried<sup>1</sup>

9 <sup>1</sup>OLVG Hospital, Department of anaesthesia, Oosterpark 9 Postal Code 1091 AC Amsterdam, The  
10 Netherlands

11 <sup>2</sup>University of Amsterdam, faculty of medicine, Meibergdreef 9 Postal Code 1105 AZ Amsterdam, The  
12 Netherlands

13 <sup>3</sup>OLVG Hospital, department of information technology, Oosterpark 9 Postal Code 1091 AC  
14 Amsterdam, The Netherlands

15 <sup>4</sup>Maastad Hospital, Department of Anaesthesia, Maastadweg 21 Postal Code 3079 DZ Rotterdam,  
16 The Netherlands

17 <sup>5</sup>University Medical Centre Utrecht, department of anaesthesia, Heidelberglaan 100 Postal Code  
18 3584 CX Utrecht, The Netherlands

19

20 \*Corresponding author:

21 [b.thiel@olvg.nl](mailto:b.thiel@olvg.nl)

NOTE: This preprint reports new research that has not been certified by peer review and should not be used to guide clinical practice.

22 **ABSTRACT**

23 Contact with the hospital is usually limited for patients after daycare surgery. Dedicated smartphone  
24 applications can improve communication and possibly enhance outcomes. The objective of this  
25 retrospective study was to evaluate patients' self-reported pain and nausea and assess the success of  
26 routine implementation of a smartphone application for outcome reporting. During preoperative  
27 assessment, patients were instructed to download and activate the smartphone application to report  
28 pain, nausea and to be in contact with the hospital after discharge. Main outcome was the number of  
29 patients actively using the smartphone application and the incidence of pain and nausea on  
30 postoperative day 1 to 7. In total, 4952 patients were included in the study. A total of 592 (12%)  
31 participants downloaded the application, of whom 351 (7%) were active users. A total of 4360 (88%)  
32 participants refrained from downloading the application. 56% (2,769) were female, the median age  
33 was 46 (18-92), and 4286 (87%) were classified as 1 or 2 American Society of Anesthesiologists  
34 Physical Status (ASA). Postoperative pain was experienced by 174 (76%) of 229 active users on  
35 postoperative day (POD) 1 and decreased to 44 (44%) of 100 active users on POD7. Postoperative  
36 nausea was experienced by 63 (28%) of 229 active users on POD1 and decreased to 12 (12%) of 100  
37 active users on POD7. Female sex (p .000), socioeconomic status (p .001), and surgical severity (p  
38 .001) showed statistically significant differences between active users, non-active users, and non-  
39 downloaders. Most patients active with the application experienced pain and nausea on the first and  
40 second day after discharge. Only a minority of the patients used the application. Those who used it  
41 were satisfied with the possibilities offered to them. Future research should focus on increasing the  
42 uptake and effect of this application on the quality of recovery.

43

44 **AUTHOR SUMMARY:**

45 In the past, surgical recovery mainly occurred in hospitals. However, advancements in minimally  
46 invasive surgical techniques and anaesthesia have enabled us, to allow patients to recover at home

47 after daycare surgery. It is common practice that we provide patients with verbal and written  
48 instructions for managing their pain and nausea after discharge. Nevertheless, we have noticed that  
49 patients often face challenges when attempting to contact the hospital in case of severe pain or  
50 nausea, and as healthcare professionals, we often lack insight into their recovery at home. To  
51 address these issues and improve patient care, we implemented a smartphone application called the  
52 OLVG Pain app specifically for our daycare surgical patients. The application empowers our patients  
53 to regularly report their pain and nausea scores and request consultations or adjustments to their  
54 medication as needed. Among the 4952 patients in our study, only a mere 7% actively used the app.  
55 We have found that postoperative pain and nausea were predominantly reported by the active users  
56 on postoperative day 1 and 2. The app's low uptake and usage suggest that there may be potential  
57 barriers related to the digital divide, particularly among our patient population. Further research is  
58 needed to explore these barriers, improve adoption rates, and assess the app's impact on  
59 postoperative recovery.

60

## 61 **INTRODUCTION**

62 Previously, surgical recovery was typically performed in hospitals. Today, with the adoption of  
63 minimally invasive surgical procedures and modern anaesthesia techniques, patients can recover at  
64 home after surgery in daycare. This shift has resulted in an increase in the number of daycare  
65 procedures performed, as they are cost-effective and allow for earlier discharge [1]. In practice,  
66 discharge from daycare surgery is possible as soon as vital signs are stabilized and the patient feels  
67 comfortable. The patient then received verbal and written instructions on how to act in case of pain  
68 and nausea [2]. Moreover, the patient was discharged with a prescription for analgesics and  
69 antiemetics, if deemed necessary. The importance of effective postoperative pain management has  
70 been demonstrated by a recent randomized controlled trial showing an association between a high  
71 pain level and poor or intermediate quality of recovery [3].

72 However, patients often encounter difficulties when attempting to contact the hospital by phone in  
73 cases of severe pain or nausea. In turn, healthcare professionals involved often have little insight into  
74 the recovery trajectory of their patients at home. Remote monitoring with a direct feedback loop  
75 between patients and healthcare professionals to tailor pain and nausea management could  
76 overcome these problems and improve clinical patient outcomes [4].

77 Since February 2020, we have provided daycare surgical patients in our hospital with a smartphone  
78 application, the OLVG pain app, which allows them to report their pain and nausea scores regularly.  
79 Furthermore, they could use the app to request consultation with the hospital for advice or  
80 adjustment of their medication. This dedicated application was developed in collaboration with  
81 patients and evaluated in a proof-of-concept study of 50 hospitalized patients and 12 hospital  
82 stakeholders, such as anaesthetists and software engineers [5]. The results showed that the  
83 smartphone application was user-friendly and had high satisfaction among patients and  
84 stakeholders, with outcomes comparable to pain assessments by nurses [5].

85 Despite the potential benefits of eHealth tools and mobile apps in patient care, their use is largely  
86 driven by optimistic rather than evidence-based assumptions [6]. The present study aimed to  
87 contribute to the evidence of mobile health by evaluating self-reported postoperative pain and  
88 nausea scores of patients using the app one year after its implementation in daycare. In addition, we  
89 evaluated the uptake and actual use of the app by the patients to assess whether the routine  
90 provision of such a tool is feasible.

## 91 **METHODS**

### 92 **Study design and setting**

93 From 10/02/2020 to 29/03/2021, a retrospective observational cohort study was conducted in OLVG  
94 Hospital, a large teaching hospital with two locations in Amsterdam, the Netherlands. Annually, over  
95 8.500 daycare surgical interventions are performed in OLVG.

## 96 **Participants and perioperative anaesthesia practice**

97 The following inclusion criteria were required: age >18 years and scheduled for daycare surgery. The  
98 exclusion criterion was unplanned stay in the hospital after daycare surgery.

99 During the preoperative assessment, information about the type of anaesthesia, medication, and the  
100 need for preoperative fasting was explained. The patient was also informed about the OLVG Pain app  
101 and received instructions for its use. A summary with the instructions was sent by e-mail or letter.  
102 Between January 2021 and March 2021, a researcher (CS) was available at the daycare ward for  
103 assistance with downloading the app on the patient's smartphone and connecting it to their medical  
104 records.

105 After downloading the app, the patients entered their surnames, dates of birth, and gender. They  
106 were asked to consent to using their anonymized data for research purposes and to allow the app to  
107 send reminder notifications. Administrative staff verified the patient's identity and connected the  
108 app to their medical records in EPIC® (1979 – 2022 Epic Systems Corporation, Wisconsin, United  
109 States). Hands-on instructions were provided by one of the researchers if required.

110 Anaesthesia, postoperative pain (POP) and postoperative nausea and vomiting (PONV) were  
111 managed according to the standards of the Dutch Society of Anaesthetists (NVA) [7, 8]. POP during  
112 admission was managed with acetaminophen, naproxen, and in cases of expected severe pain with  
113 oxycodone. PONV prophylaxis for patients receiving general anaesthesia was intraoperatively  
114 managed with dexamethasone and granisetron. In case of PONV available treatment options were,  
115 granisetron, droperidol, metoclopramide, and domperidone.

116 Patients were discharged with instructions on how to manage POP and PONV and how to take care  
117 of the surgical wound. They received a medication box containing analgesic and antiemetic  
118 medication for three days postoperative. Two medication boxes were used in this study. In the case  
119 of minor surgical procedures, the patient received paracetamol, naproxen, pantoprazole, and

120 metoclopramide. In the case of intermediate surgical procedures, long-acting oxycodone was added  
121 for the first postoperative day.

122 Patients were able to report their pain and nausea for up to seven days postoperative using the  
123 smartphone application ‘OLVG Pain app’. The app sent three daily reminder notifications; however,  
124 the reporting was voluntary. Pain and nausea scores were displayed on the patients’ electronic charts  
125 in the app. Data were obtained from the patients’ medical records (Epic Systems Corporation. 2020.  
126 Epic Hyperspace). Data of patients active with the app were aggregated and displayed on a  
127 healthcare professional monitoring dashboard, which was observed daily by a medical assistant or  
128 physician assistant trained in pain and nausea assessments. If a patient reported unbearable pain or  
129 nausea and requested assistance, they were contacted by message (via EPIC patient e-mail) or by  
130 telephone.

### 131 **Smartphone application**

132 Logicapps, Inc. was commissioned by the Department of Anaesthesiology of OLVG Hospital to  
133 develop a specialized app for patients to self-report postoperative pain and nausea, “The OLVG Pain  
134 App”. The app was designed for use on smartphones and tablets with Android 5.0 or higher and IOS  
135 11.0 or higher operating systems, and was developed in collaboration with the Local Patient Council  
136 and the Dutch Society of Anaesthesiology. The following ‘in-app’ questions regarding postoperative  
137 pain were asked: ‘Are you in pain?’; “How much pain do you have: 0 to 10 on numerical rating scale  
138 (NRS)?”, “Is your pain bearable?”, “Are you hindered by pain?” “Do you feel something must be  
139 done to relieve your pain?” [5]. Nausea assessment in the app was based on the Myles Nausea  
140 Impact Scale [9], which assesses the presence of nausea, vomiting, and whether the patient  
141 requested treatment for nausea. The app automatically ended the 7-day postoperative follow-up  
142 with four close-out questions addressing overall pain, nausea, satisfaction with the app, and whether  
143 the medical assistant or physician assistant responded in time. The application was connected to the  
144 electronic medical records through a secure FHIR HL7 server connection.

145 **Outcome**

146 The primary outcome was to assess the incidence of patients with self-reported postoperative pain  
147 and nausea based on their response to the question “Are you in pain?” and ‘Are you nauseous?’,  
148 with the possible answers “yes” or “no,” after daycare surgery at postoperative day (POD) 1 to 7.  
149 Secondary outcomes for POD 1 up to POD 7 were: Pain intensity reported with the ‘in-app’ numeric  
150 rating scale. Incidence of unbearable postoperative pain and patients requiring additional pain  
151 management. Incidence of nausea and patients requiring additional treatment. Uptake of the  
152 application and differences in characteristics between active users and non-users of the application.  
153 Overall experienced pain, nausea and satisfaction with the application and received assistance

154 **Data collection, Statistical analysis and reporting**

155 Data were extracted from the OLVG data warehouse after running a query with the inclusion criteria  
156 of a software specialist (JR). Researchers BT, CS, and JB checked the data for completeness and  
157 manually added the missing patients or values. Additionally, we collected data on the socioeconomic  
158 status (SES) of the participants provided by Statistics Netherlands (CBS). The SES score is a  
159 representation of how municipalities, neighbourhoods, and communities in the Netherlands  
160 compare with each other. The average SES score is approximately 0; a higher score indicates that  
161 residents are more prosperous, have higher levels of education, and/or are employed for longer  
162 periods. In this study, the score was used as an explanatory variable to examine differences between  
163 participants in the use of healthcare facilities such as the OLVG pain app. Data were analyzed using  
164 SPSS statistics (version 22.0 (IBM Corp. Released 2013. IBM SPSS Statistics for Windows, Version 22.0.  
165 Armonk, NY: IBM Corp.)). Normally distributed data are shown as means and standard deviations  
166 (SD). Non-normally distributed data are shown as medians with interquartile ranges (IQR). Inter-  
167 group differences were tested using appropriate parametric and non-parametric tests.  
168 STrengthening the Reporting of OBservational studies in Epidemiology (STROBE) and REporting of

169 studies Conducted using Observational Routinely-collected Data (RECORD) guidelines were followed  
170 to present the results in this paper [10, 11].

## 171 **Ethics**

172 Ethical approval for this study (WO 20.239) was provided by the medical ethics committee (ACWO)  
173 and institutional board of directors of OLVG hospital, Amsterdam, the Netherlands (Chair of the  
174 boards Prof. dr. M.A.A.J. van den Bosch) on 14 January 2021. Furthermore, the study was conducted  
175 according to the principles of Good Clinical Practice and in accordance with the declaration of  
176 Helsinki [12, 13].

## 177 **RESULTS**

178 A total number of 4952 patients were included in the study. A total of 592 (12%) patients  
179 downloaded the application, of which 351 (7%) were unique active users (Figure 1). A total of 4360  
180 (88%) patients refrained from downloading the application. Patient characteristics are presented in  
181 (Table 1). A little more than half of patients were female 56%; 2769), and the median age was 46 (18-  
182 92). Most patients had an American Society of Anesthesiologists Physical Status (ASA) of 1, 45%  
183 (2217) and 2, 42% (2.069). The mean socio-economic-status (SES) score was -0.05434 (SD = 0.22).  
184 General and traumatic surgeries represented 51% (2,541) of the patients, and 80% (3,950) of the  
185 surgical interventions were classified as minor surgical risks. There were statistically significant  
186 differences in sex, socioeconomic status, and surgical risk between the active user, non-active user,  
187 and non-downloader groups.

188 **Figure 1.** Patient flowchart



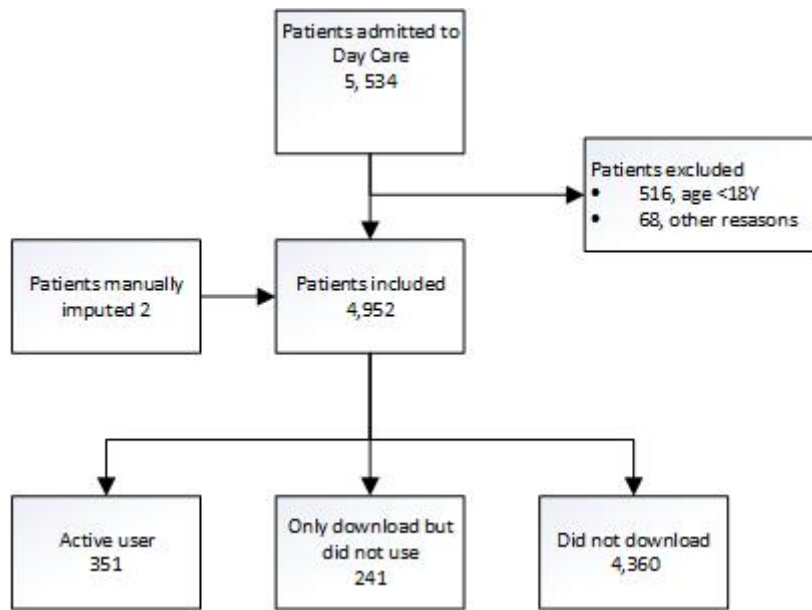

189

190 **Table 1.** Baseline characteristics of eligible patients admitted to day care

|                                            | Total cohort  | Active        | Not active    | Not downloaded | p**  |
|--------------------------------------------|---------------|---------------|---------------|----------------|------|
| Cases, n (%)                               | 4952          | 351 (7%)      | 241 (5%)      | 4360 (88%)     |      |
| Age, median (range)                        | 46 (18-92)    | 44 (19-85)    | 44 (18-82)    | 46 (18-92)     | .129 |
| Sex female, n (%)                          | 2769 (56%)    | 222 (63%)     | 164 (68%)     | 2383 (55%)     | .000 |
| ASA 1, n (%)                               | 2217 (45%)    | 163 (47%)     | 111 (46%)     | 1943 (45%)     | .318 |
| ASA 2, n (%)                               | 2069 (42%)    | 145 (41%)     | 100 (42%)     | 1824 (42%)     |      |
| ASA 3, n (%)                               | 634 (13%)     | 42 (12%)      | 27 (11%)      | 565 (13%)      |      |
| ASA 4, n (%)                               | 9 (<1%)       | 0             | 0             | 9 (<1%)        |      |
| SES, mean (SD)                             | -,05434 (,22) | -,01356 (,21) | -,05534 (,23) | -,05755 (,22)  | .001 |
| <b>Surgical risk classification, n (%)</b> |               |               |               |                | .001 |
| Minor                                      | 3950 (80%)    | 254 (73%)     | 184 (76%)     | 3513 (81%)     |      |
| Intermediate                               | 1000 (20%)    | 96 (27%)      | 57 (24%)      | 847 (19%)      |      |

191 **\*\* p-value of < 0.05 is considered statistically significant, depending on the variable characteristics**  
 192 **and distribution the following test are used for Age, Kruskal Wallis for Gender, Chi squared for ASA**  
 193 **Chi squared for trend for Socioeconomic status (SES), ANOVA and for Risk classification, Chi squared.**  
 194 **ASA: American Society of Anesthesiologist; n = number, SES: social economic status**

195

196 **Primary Outcome**

197 Postoperative pain (are you in pain = yes) was experienced by 174 (76%) of 229 active users on POD 1  
 198 (Table 2). This decreased to 44 (44%) of the 100 active users on POD7 (Figure 2). Similarly,  
 199 postoperative nausea and vomiting (nauseous = yes) was experienced by 63 (28%) of 229 active users  
 200 on POD1. This decreased to 12 (12%) of 100 active users on POD7 (Figure 3).

201 **Table 2.** Overview of pain and nausea reporting of patients actively using the app

| Patients actively using the app = 351       | Day 1      | Day 2      | Day 3      | Day 4      | Day 5      | Day 6      | Day 7      |
|---------------------------------------------|------------|------------|------------|------------|------------|------------|------------|
| Patients actively using the app / day       | 229 (65%)  | 182 (52%)  | 160 (46%)  | 135 (38%)  | 131 (37%)  | 108 (31%)  | 100 (28%)  |
| Mean times used (range)                     | 2 (1 to 4) | 2 (1 to 8) | 2 (1 to 5) | 2 (1 to 5) | 2 (1 to 4) | 2 (1 to 7) | 2 (1 to 5) |
| Are you in pain?, n (%)                     | 174 (76%)  | 112 (62%)  | 105 (65%)  | 79 (56%)   | 70 (53%)   | 56 (52%)   | 44 (44%)   |
| Indicate how much pain (highest pain score) |            |            |            |            |            |            |            |
| NRS 1 to 3, n (%)                           | 34 (19%)   | 24 (21%)   | 38 (36%)   | 31 (39%)   | 29 (41%)   | 16 (29%)   | 13 (29%)   |
| NRS 4 to 7, n (%)                           | 115 (66%)  | 79 (71%)   | 65 (62%)   | 47 (59%)   | 40 (57%)   | 38 (68%)   | 30 (68%)   |
| NRS 8 to 10, n (%)                          | 25 (14%)   | 9 (8%)     | 2 (2%)     | 1 (1%)     | 1 (1%)     | 2 (4%)     | 1 (2%)     |
| Not bearable?, n (%)                        | 30 (9%)    | 14 (4%)    | 5 (5%)     | 5 (6%)     | 1 (1%)     | 3 (3%)     | 5 (11%)    |
| Something done to relieve the pain?, n (%)  | 27 (8%)    | 12 (3%)    | 4 (4%)     | 3 (4%)     | 1 (1%)     | 2 (4%)     | 4 (9%)     |
| Are you nauseous? n, (%)                    | 63 (28%)   | 48 (26%)   | 31 (19%)   | 21 (16%)   | 20 (15%)   | 18 (17%)   | 12 (12%)   |
| Something done to relieve nausea?, n (%)    | 6 (10%)    | 4 (8%)     | 2 (6%)     | 0          | 1 (5%)     | 2 (11%)    | 0          |

202 *The total number of unique users is 351, the composition of daily users varies because some patients*  
 203 *are not active with the application on a daily basis. n = number*

204

205 **Figure 2. Incidence of postoperative pain**

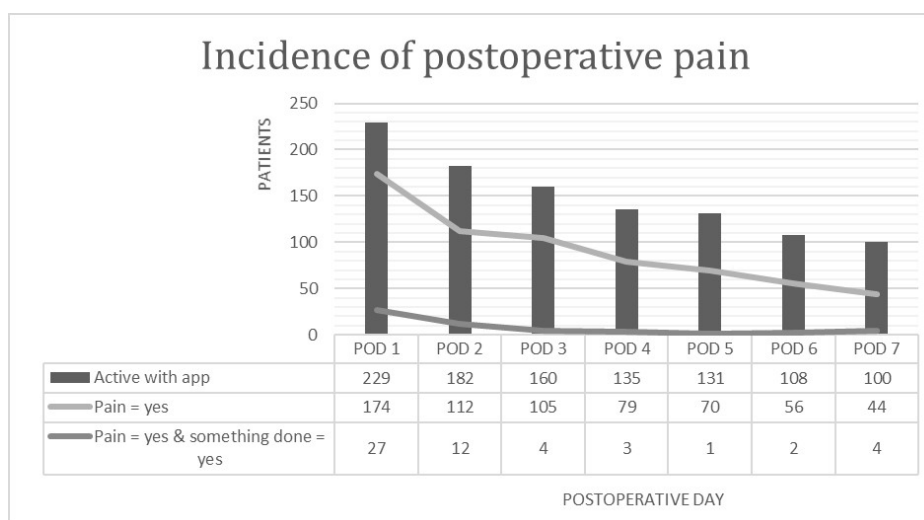

206

207 **Figure 3. Incidence of postoperative nausea**

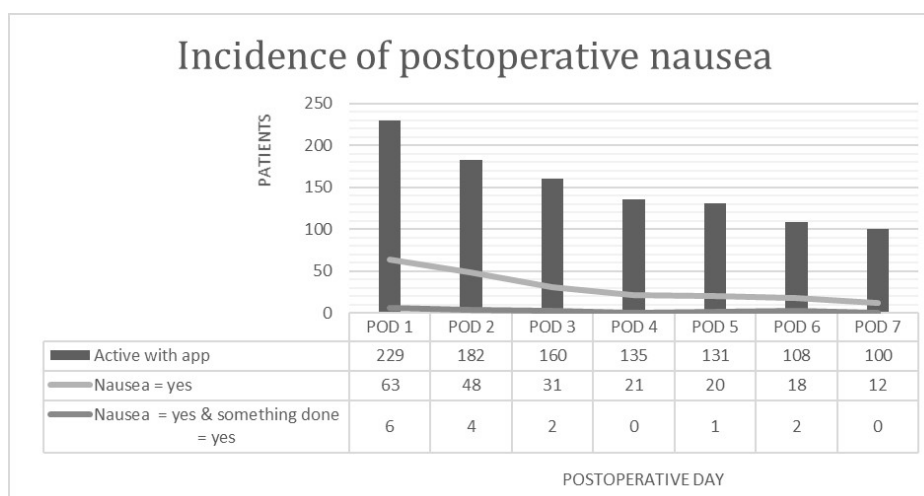

208

209 **Secondary outcome**

210 In total, 351 unique patients were active users during the 7 days postoperative follow period, with a  
211 median times used of 2 (range, 1–8). An overview of the surgical specialism and 15 high-volume  
212 procedures is provided in Supplemental Material 1. The highest pain intensity scores of the active  
213 users were reported on POD 1 and POD 2: 25 (14%) patients and 9 (8%) patients with a numerical  
214 rating scale (NRS) score of 8 to 10. The number of patients who rated their pain as not bearable and a  
215 request for relief decreased over the first 5 postoperative days, with 27 to 1 active users, respectively  
216 (Figure 2). On POD 6 and 7, no bearable pain and a request for something slightly increased to 5 and  
217 4 patients, respectively. The values regarding the request for relief decreased from 6 (10%) patients  
218 on POD1 to 0 patients on POD7.

### 219 **Overall experienced pain, nausea, satisfaction with the application and received assistance**

220 The in-app close-out questions on POD 7 were completed by 60 (17%) active users, valuing  
221 experienced pain, nausea, the remote monitoring tool, and received assistance. Regarding  
222 experienced pain, on a 5 point Likert scale, 55 (92%) patients reported no pain at all, mild pain, or  
223 bearable pain. None of the patients experienced any severe pain. Regarding nausea 54 (90%)  
224 patients reported no, little, or bearable nausea. One of the patients experienced severe nausea.  
225 Most patients were satisfied with the app 57 (95%) and reported that it was okay, pleasant, or very  
226 pleasant. A minority of 3 (5%) patients reported that it was not pleasant or unpleasant. The received  
227 assistance was rated as very pleasant, pleasant, or Ok by 56 (93%) patients, while 4 (7%) patients  
228 rated it as not pleasant or very unpleasant.

### 229 **DISCUSSION**

230 In this retrospective cohort study, we evaluated remote monitoring of pain and PONV after daycare  
231 surgery using a dedicated smartphone application (the OLVG Pain app). This evaluation was  
232 performed one year after the implementation of the app in daily practice. Our main finding was that  
233 only 11% of eligible patients downloaded the application, and that no more than 7% of all patients

234 actually used the application to report pain and nausea. Among the active users, most pain and  
235 nausea were reported in the first two days after discharge.

236 Our finding that the proportion of patients reporting pain was highest on POD 1 and 2, with up to  
237 14% of reportings indicating severe pain, is in line with the available literature. However, previous  
238 studies showed an overall higher prevalence of moderate-to-severe pain of 30% on POD1 [14, 15]  
239 and up to 43% on POD 7 [16]. This difference may be due to the chosen threshold for moderate to  
240 severe pain and the patient study population.

241 Regarding PONV, we found a relatively high proportion of patients who experienced nausea;  
242 however, only a small percentage requested relief. Few studies have evaluated PONV after daycare  
243 surgery, demonstrating similar incidences, varying from 28% to 57% [17-20]. The heterogeneity of  
244 the methodologies and our low response rate make it difficult to compare the results. Only one study  
245 reported PONV rates up to POD7, a prospective observational cohort study that included 239  
246 patients and found that 6% of the patients experienced nausea on POD7 [18].

247 Despite the promising results of our previous proof-of-concept study [5], the uptake and use of the  
248 application was surprisingly low. We anticipated that more patients would have used it after  
249 discharge, especially since we had researched and addressed important implementation themes  
250 regarding design, prototype, clear value proposition, intended users, organization, and external  
251 issues [21-23]. Possibly we are still facing, with regards to Rogers's diffusion of innovation theory  
252 (DOI), that patients who are actively using the application are the 'innovators' and 'early adopters'  
253 and that we still have not passed the point of critical mass for innovation adoption amongst our  
254 patients [24].

255 One potential challenge that may have been overlooked is the digital divide, which is linked to pre-  
256 existing social inequalities as a contributing factor to non-adherence to e-health [25]. This accounts  
257 for OLVG Hospital patients, as these locations are situated in low socio-economic neighborhoods of  
258 Amsterdam [26]. The mean socioeconomic score (SES) of the patients in our study was below 0,

259 indicating that they were less prosperous, had lower levels of education, and were employed for  
260 shorter periods than the average number of residents in the Netherlands. This is supported by the  
261 results of a recent study conducted in Amsterdam among mothers from low-SES backgrounds [27].  
262 This shows that poverty and the complexity of information and communication technology,  
263 particularly for first-generation, non-Western immigrants, influence perspectives, experiences, and  
264 ICT-related needs. Therefore, it is plausible that many of our patients lacked access to or were unable  
265 to use the remote-monitoring app.

266 This study has some limitations, including those inherent to observational cohort studies that could  
267 affect our data and outcomes [28]. Furthermore, the COVID-19 pandemic was still ongoing during the  
268 study period, which is likely to have impacted our study results. Measures such as social distancing  
269 and the deployment of surgical and anesthesia staff in covid care have resulted in cancellations or  
270 postponement of daycare surgeries. This resulted in fewer patients in the study cohort. Those who  
271 were admitted underwent more urgent surgical procedures, which explains the high percentage of  
272 trauma patients in our data.

273 One of the advantages of our study is that the outcomes of pain and nausea were self-reported by  
274 the patient at home without interference from a healthcare professional. It is known that both the  
275 patient and healthcare professionals alter the pain and nausea reporting for their benefit or adjust  
276 them to subjective perceptions during interactive assessments [29, 30]. Therefore, we still believe  
277 that self-reporting is likely to provide less biased and more realistic outcome data. However, the low  
278 number of active users and irregular reporting of symptoms may limit the interpretation of the  
279 results. Future research should focus on the uptake of mobile health and remote monitoring, and  
280 whether it benefits the quality of recovery.

## 281 **Conclusion**

282 Most patients active with the application experienced pain and nausea on the first and second days  
283 after discharge, but only a small minority of eligible patients used the application. Those who used it

284 were satisfied with the possibilities offered to them. Future research should focus on increasing the  
285 uptake and effect of this application on the quality of recovery.

## 286 ACKNOWLEDGEMENTS

287 Financial support and sponsorship: The SIDN fund, a public benefit organization for Dutch Internet  
288 domain registration (URL: [www.SIDNfonds.nl](http://www.SIDNfonds.nl)), partially funded the development of the smartphone  
289 application. The funders had no role in the study design, data collection and analysis, decision to  
290 publish, or manuscript preparation.

291 Conflicts of Interest: non declared

## 292 REFERENCES

- 293 1. Surgery, I.A.o.A. *IAAS Statement on the Covid Pandemic*. 2021; Available from: [https://iaas-](https://iaas-med.com/index.php/iaas-initiatives)  
294 [med.com/index.php/iaas-initiatives](https://iaas-med.com/index.php/iaas-initiatives).
- 295 2. Jakobsson, J.G., *Recovery and discharge criteria after ambulatory anesthesia: can we improve*  
296 *them?* *Curr Opin Anaesthesiol*, 2019. **32**(6): p. 698-702.
- 297 3. Stessel, B., et al., *One-month recovery profile and prevalence and predictors of quality of*  
298 *recovery after painful day case surgery: Secondary analysis of a randomized controlled trial*.  
299 *PLoS One*, 2021. **16**(1): p. e0245774.
- 300 4. van der Meij, E., et al., *The Effect of Perioperative E-Health Interventions on the Postoperative*  
301 *Course: A Systematic Review of Randomised and Non-Randomised Controlled Trials*. *PLoS*  
302 *One*, 2016. **11**(7): p. e0158612.
- 303 5. Thiel, B., et al., *Patient reported postoperative pain with a smartphone application: A proof of*  
304 *concept*. *PLoS One*, 2020. **15**(5): p. e0232082.
- 305 6. Enam, A., J. Torres-Bonilla, and H. Eriksson, *Evidence-Based Evaluation of eHealth*  
306 *Interventions: Systematic Literature Review*. *J Med Internet Res*, 2018. **20**(11): p. e10971.
- 307 7. Anaesthesists, D.s.o., *Perioperatief traject*. 2020, Federatie Medisch Specialisten.
- 308 8. Anaesthesists, D.s.o., *Richtlijn Postoperatieve pijn*. 2012, Nederlandse Vereniging voor  
309 Anesthesiologie Utrecht.
- 310 9. Myles, P.S. and R. Wengritzky, *Simplified postoperative nausea and vomiting impact scale for*  
311 *audit and post-discharge review*. *Br J Anaesth*, 2012. **108**(3): p. 423-9.
- 312 10. von Elm, E., et al., *The Strengthening the Reporting of Observational Studies in Epidemiology*  
313 *(STROBE) statement: guidelines for reporting observational studies*. *J Clin Epidemiol*, 2008.  
314 **61**(4): p. 344-9.
- 315 11. Benchimol, E.I., et al., *The REporting of studies Conducted using Observational Routinely-*  
316 *collected health Data (RECORD) statement*. *PLoS Med*, 2015. **12**(10): p. e1001885.
- 317 12. Henry, K.A., *GCP Definition and Principles*, in *The Fundamentals of Clinical Research*. 2022. p.  
318 47-57.
- 319 13. World Medical, A., *World Medical Association Declaration of Helsinki: ethical principles for*  
320 *medical research involving human subjects*. *JAMA*, 2013. **310**(20): p. 2191-4.
- 321 14. McGrath, B., et al., *Thirty percent of patients have moderate to severe pain 24 hr after*  
322 *ambulatory surgery: a survey of 5,703 patients*. *Can J Anaesth*, 2004. **51**(9): p. 886-91.

- 323 15. Gramke, H.F., et al., *Predictive factors of postoperative pain after day-case surgery*. Clin J  
324 Pain, 2009. **25**(6): p. 455-60.
- 325 16. Rosen, H.I., et al., *Patients experiences of pain following day surgery - at 48 hours, seven days*  
326 *and three months*. Open Nurs J, 2011. **5**: p. 52-9.
- 327 17. Apfel, C.C., et al., *Who is at risk for postdischarge nausea and vomiting after ambulatory*  
328 *surgery?* Anesthesiology, 2012. **117**(3): p. 475-86.
- 329 18. Odom-Forren, J., et al., *Incidence and predictors of postdischarge nausea and vomiting in a 7-*  
330 *day population*. J Clin Anesth, 2013. **25**(7): p. 551-9.
- 331 19. Bruderer, U., et al., *Post-discharge nausea and vomiting after total intravenous anaesthesia*  
332 *and standardised PONV prophylaxis for ambulatory surgery*. Acta Anaesthesiol Scand, 2017.  
333 **61**(7): p. 758-766.
- 334 20. Wallden, J., J. Flodin, and M. Hultin, *Validation of a prediction model for post-discharge*  
335 *nausea and vomiting after general anaesthesia in a cohort of Swedish ambulatory surgery*  
336 *patients*. Eur J Anaesthesiol, 2016. **33**(10): p. 743-9.
- 337 21. Greenhalgh, T., et al., *Beyond Adoption: A New Framework for Theorizing and Evaluating*  
338 *Nonadoption, Abandonment, and Challenges to the Scale-Up, Spread, and Sustainability of*  
339 *Health and Care Technologies*. J Med Internet Res, 2017. **19**(11): p. e367.
- 340 22. Greenhalgh, T. and C. Papoutsi, *Spreading and scaling up innovation and improvement*. BMJ,  
341 2019. **365**: p. l2068.
- 342 23. Thiel, B., et al., *Adoption of a Postoperative Pain Self-Report Tool: Qualitative Study*. JMIR  
343 Hum Factors, 2022. **9**(2): p. e33706.
- 344 24. Dearing, J.W. and J.G. Cox, *Diffusion Of Innovations Theory, Principles, And Practice*. Health  
345 Aff (Millwood), 2018. **37**(2): p. 183-190.
- 346 25. Livingood, W.C., et al., *Comparative study of different SES neighborhood clinics for health*  
347 *literacy and internet access*. Digit Health, 2022. **8**: p. 20552076221123715.
- 348 26. Statistiek, C.B.v. *Sociaal-economische-status per postcode 2019*; Available from:  
349 [https://www.cbs.nl/nl-nl/maatwerk/2022/26/sociaal-economische-status-per-postcode-](https://www.cbs.nl/nl-nl/maatwerk/2022/26/sociaal-economische-status-per-postcode-2019)  
350 [2019](https://www.cbs.nl/nl-nl/maatwerk/2022/26/sociaal-economische-status-per-postcode-2019).
- 351 27. Goedhart, N.S., et al., *'Just having a computer doesn't make sense': The digital divide from*  
352 *the perspective of mothers with a low socio-economic position*. New Media & Society, 2019.  
353 **21**(11-12): p. 2347-2365.
- 354 28. Wang, M.T., M.J. Bolland, and A. Grey, *Reporting of Limitations of Observational Research*.  
355 JAMA Intern Med, 2015. **175**(9): p. 1571-2.
- 356 29. van Dijk, J.F., et al., *The Relation Between Patients' NRS Pain Scores and Their Desire for*  
357 *Additional Opioids after Surgery*. Pain Pract, 2015. **15**(7): p. 604-9.
- 358 30. van Dijk, J.F., et al., *Postoperative patients' perspectives on rating pain: A qualitative study*.  
359 Int J Nurs Stud, 2016. **53**: p. 260-9.

360

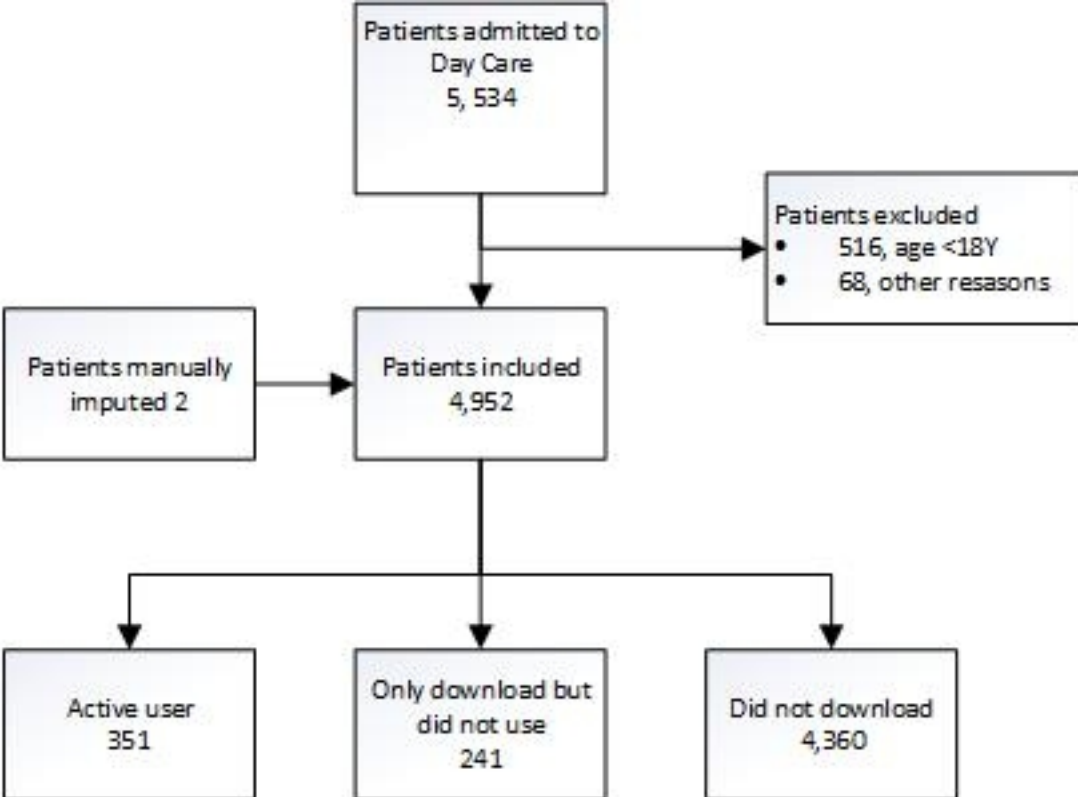

Figure 1



# Incidence of postoperative pain

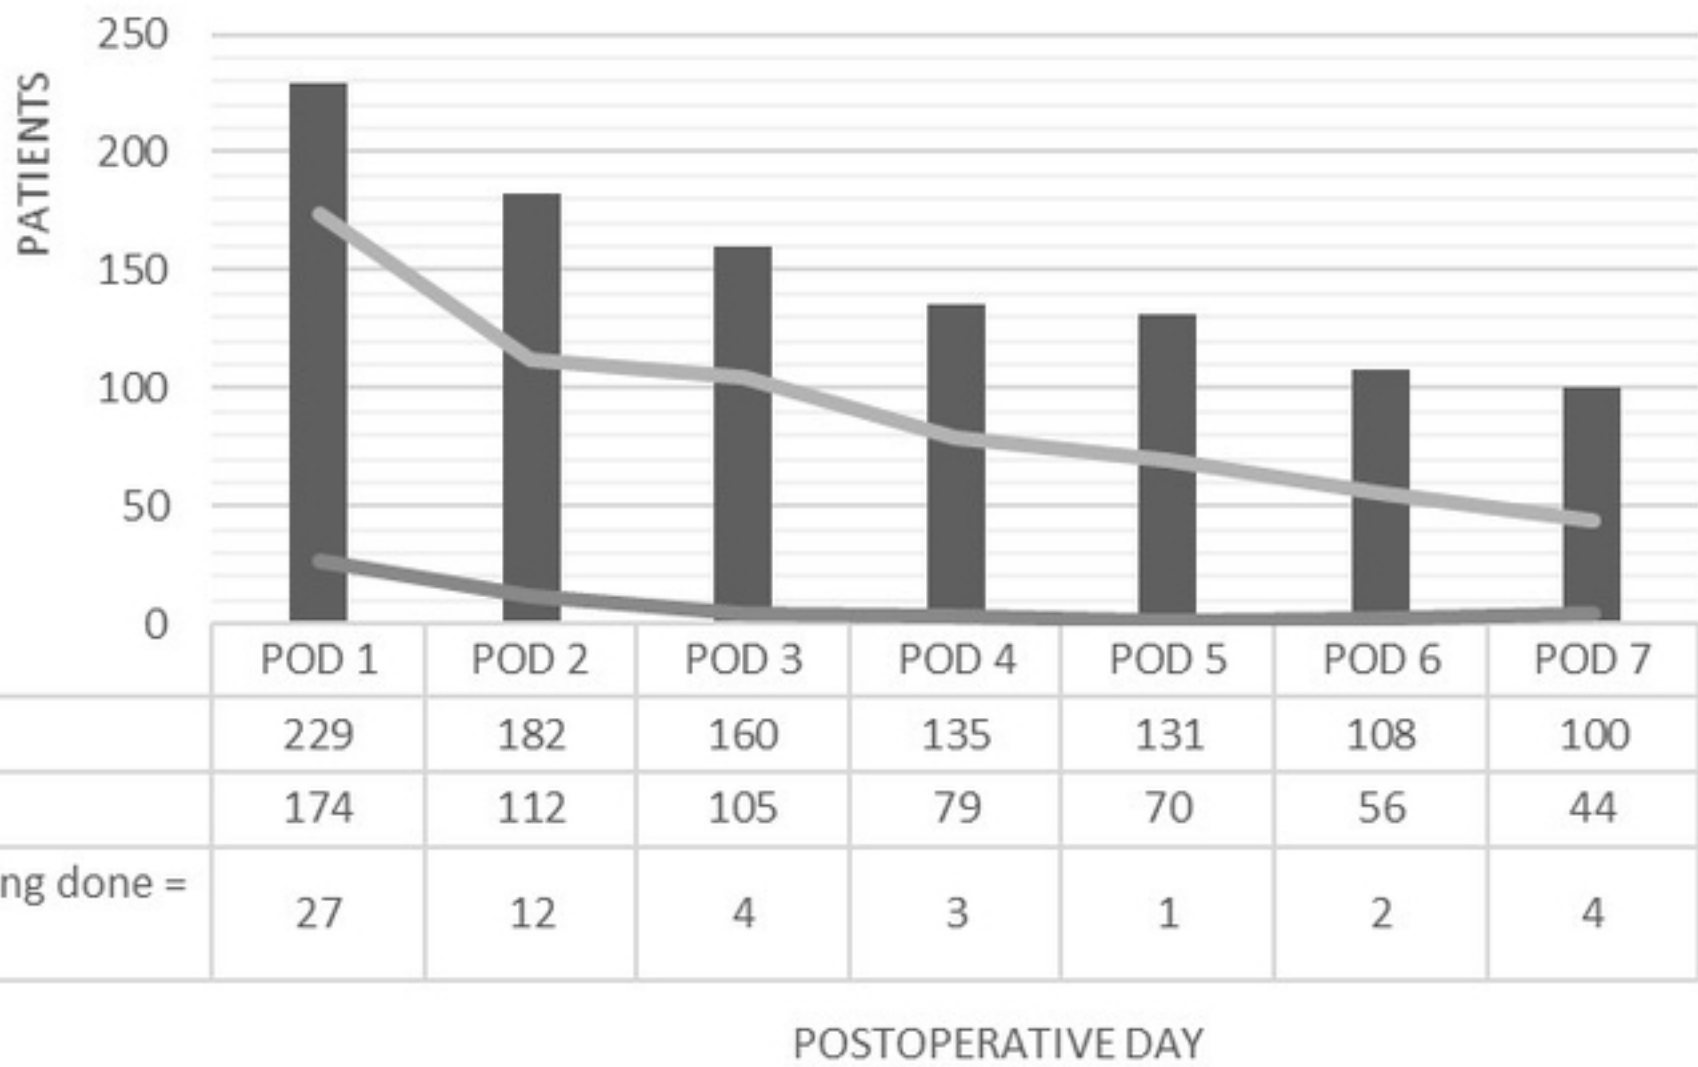

Figure 2

# Incidence of postoperative nausea

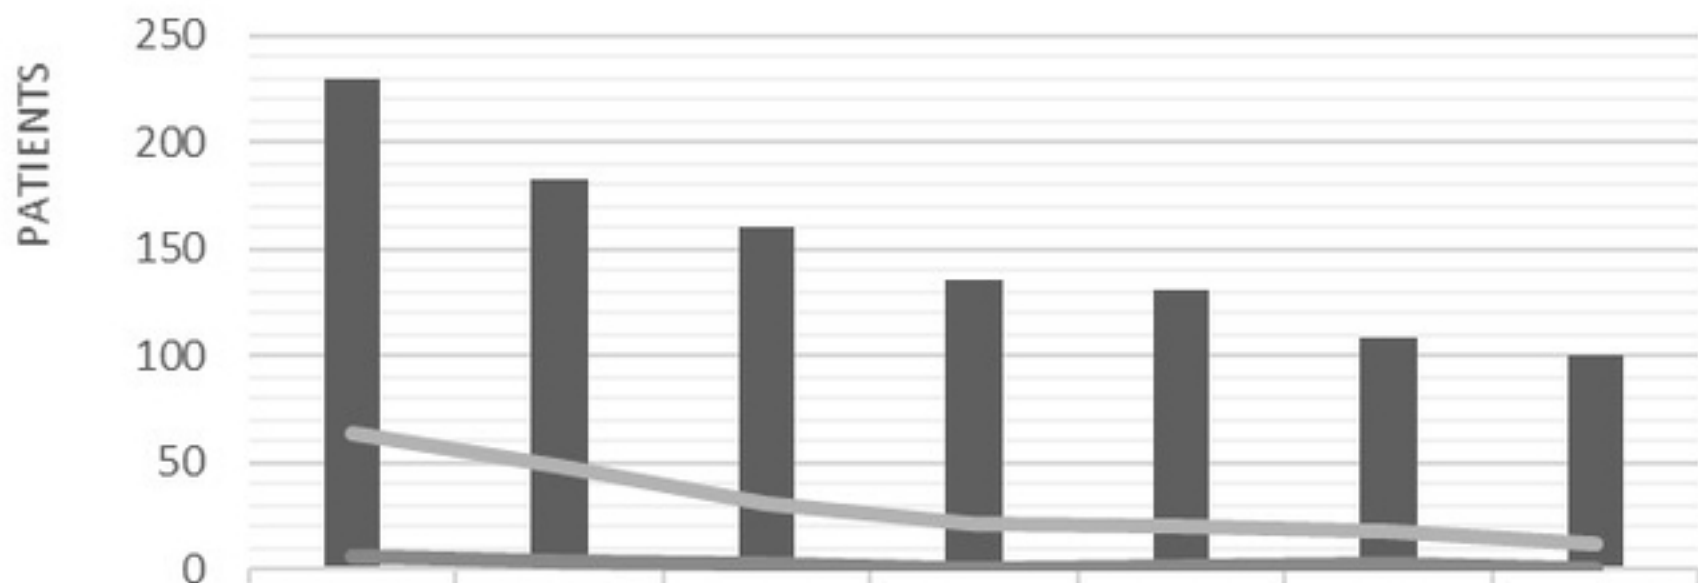

|                                     | POD 1 | POD 2 | POD 3 | POD 4 | POD 5 | POD 6 | POD 7 |
|-------------------------------------|-------|-------|-------|-------|-------|-------|-------|
| Active with app                     | 229   | 182   | 160   | 135   | 131   | 108   | 100   |
| Nausea = yes                        | 63    | 48    | 31    | 21    | 20    | 18    | 12    |
| Nausea = yes & something done = yes | 6     | 4     | 2     | 0     | 1     | 2     | 0     |

POSTOPERATIVE DAY

Figure 3
